# Supplementary material for: Efficacy of Regorafenib in Hepatocellular Carcinoma Patients: A Systematic Review and Meta-Analysis
Source: MDPI journal article supplement (doi:10.3390/cancers12010036), 2019-12-20

**Supplementary Table 1. Risk of bias assessment and quality of included studies.**

| Observational studies <sup>a</sup>       |   |   |           |               |         |   |                 |   |
|------------------------------------------|---|---|-----------|---------------|---------|---|-----------------|---|
|                                          |   |   | Selection | Comparability | Outcome |   | Overall quality |   |
| Bruix 2013                               |   |   | ***       | NA            | **      |   | H               |   |
| Ogasawara 2019                           |   |   | ***       | NA            | **      |   | H               |   |
| Wang 2019                                |   |   | **        | NA            | **      |   | M               |   |
| Yoo 2018                                 |   |   | ***       | NA            | **      |   | H               |   |
| Kuzuya 2019                              |   |   | **        | NA            | **      |   | M               |   |
| Lee 2019                                 |   |   | *         | **            | *       |   | L               |   |
| Lee 2019 (ii)                            |   |   | *         | NA            | *       |   | L               |   |
| Randomized controlled trial <sup>b</sup> |   |   |           |               |         |   |                 |   |
| 1                                        |   | 2 | 3         | 4             | 5       | 6 | 7               |   |
| RESORCE 2017                             | L | L | L         | L             | L       | L | L               | H |

L, low; H, high; U, unclear; M, moderate; NA, Not Applicable.

<sup>a</sup> Study quality assessment performed by means of Newcastle/Ottawa scale (each asterisk represents if the respective criterion within the subsection was satisfied)

<sup>b</sup> Cochrane Collaboration's tool for assessing the risk of bias across 7 domains: 1 (Random sequence generation), 2 (Allocation concealment), 3 (Blinding of participants and personnel), 4 (Blinding of outcome assessment), 5 (Incomplete outcome data), 6 (Selective reporting) and 7 (Other bias).

**Supplementary Table 2. Adverse events reported in the included studies**

|                            | Bruix 2013<br>(total=36) | RESORCE trial               |                             | Ogasawara,<br>2019 (total =<br>44) | Wang 2019<br>(Total = 38) | Yoo 2018<br>(total = 40) |
|----------------------------|--------------------------|-----------------------------|-----------------------------|------------------------------------|---------------------------|--------------------------|
|                            |                          | Regorafenib<br>(Total =374) | Placebo<br>(Total =<br>163) |                                    |                           |                          |
| Any Adverse event          |                          |                             |                             |                                    |                           |                          |
| Any Grade                  | 35 (97.2%)               | 346 (92.5%)                 | 100<br>(61.3%)              |                                    |                           |                          |
| ≥3                         | 21 (58.3%)               | 187 (50%)                   | 32<br>(19.6%)               |                                    |                           |                          |
| Diarrhea                   |                          |                             |                             |                                    |                           |                          |
| Any Grade                  | 19 (52.8%)               | 125 (33.4%)                 | 18<br>(11.04%)              | 23 (52.3%)                         | 21 (55.3%)                | 11 (27.5%)               |
| ≥3                         | 2 (5.6%)                 | 9 (2.4%)                    | 0                           | 3 (6.8%)                           | 4 (10.5%)                 | 0                        |
| Fatigue                    |                          |                             |                             |                                    |                           |                          |
| Any Grade                  | 19 (52.8%)               | 110 (29.4%)                 | 37<br>(22.7%)               | 21 (47.7%)                         | 28 (73.7%)                | 7 (17.5%)                |
| ≥3                         | 6 (16.7%)                | 24 (6.4%)                   | 3 (1.8%)                    | 2 (4.5%)                           | 1 (2.6%)                  | 0                        |
| Hand–foot skin<br>reaction |                          |                             |                             |                                    |                           |                          |
| Any Grade                  | 19 (52.8%)               | 196 (52.4%)                 | 13<br>(7.98%)               | 30 (68.2%)                         | 25 (65.8%)                | 27 (67.5%)               |
| ≥3                         | 5 (13.9%)                | 47 (12.6%)                  | 1 (0.6%)                    | 30 (68.2%)                         | 2 (5.3%)                  | 3 (7.5%)                 |
| Hypothyroidism             |                          |                             |                             |                                    |                           |                          |
| Any Grade                  | 15 (41.7%)               |                             |                             |                                    |                           |                          |
| ≥3                         | 0                        |                             |                             |                                    |                           |                          |
| Anorexia                   |                          |                             |                             |                                    |                           |                          |
| Any Grade                  | 13 (36.1%)               | 88 (23.5%)                  | 12<br>(7.36%)               | 20 (45.4%)                         | 24 (63.16%)               | 6 (15%)                  |
| ≥3                         | 0                        | 10 (2.7%)                   | 0                           | 1 (2.3%)                           | 3 (7.89%)                 | 0                        |
| Hypertension               |                          |                             |                             |                                    |                           |                          |
| Any Grade                  | 13 (36.1%)               | 87 (23.26%)                 | 9 (5.5%)                    | 19 (43.18%)                        | 18 (47.4%)                | 5 (12.5%)                |
| ≥3                         | 1                        | 49 (13.1%)                  | 6 (3.6%)                    | 2 (4.5%)                           | 3 (7.9%)                  | 3 (7.5%)                 |
| Nausea                     |                          |                             |                             |                                    |                           |                          |
| Any Grade                  | 12 (33.3%)               | 40 (10.7%)                  | 13<br>(7.98%)               |                                    |                           |                          |
| ≥3                         | 0                        | 1 (0.27%)                   | 0                           |                                    |                           |                          |
| Voice changes              |                          |                             |                             |                                    |                           |                          |
| Any Grade                  | 10 (27.8%)               | 34 (3.1%)                   | 0                           | 12 (27.3%)                         |                           |                          |
| ≥3                         | 0                        | 0                           | 0                           | 0                                  |                           |                          |
| Constipation               |                          |                             |                             |                                    |                           |                          |
| Any Grade                  | 9 (25%)                  |                             |                             |                                    |                           |                          |
| ≥3                         | 0                        |                             |                             |                                    |                           |                          |
| Headache                   |                          |                             |                             |                                    |                           |                          |
| Any Grade                  | 7 (19.4%)                |                             |                             |                                    |                           |                          |
| ≥3                         | 0                        |                             |                             |                                    |                           |                          |
| Weight loss                |                          |                             |                             |                                    |                           |                          |

|                                |           |            |           |            |            |          |
|--------------------------------|-----------|------------|-----------|------------|------------|----------|
| Any Grade                      | 7 (19.4%) | 27 (7.2%)  | 3 (1.8%)  |            | 16 (42.1%) |          |
| ≥3                             | 0         | 4 (1.07%)  | 0         |            | 0          |          |
| Proteinuria                    |           |            |           |            |            |          |
| Any Grade                      | 6 (16.7%) |            |           |            |            |          |
| ≥3                             | 1 (2.8%)  |            |           |            |            |          |
| Oral mucositis                 |           |            |           |            |            |          |
| Any Grade                      | 5 (13.9%) | 42 (11.2%) | 5 (3.1%)  |            |            |          |
| ≥3                             | 1 (2.8%)  | 4 (1.07%)  | 1 (0.6%)  |            |            |          |
| Vomiting                       |           |            |           |            |            |          |
| Any Grade                      | 5 (13.9%) | 27 (7.22%) | 5 (3.1%)  |            |            |          |
| ≥3                             | 0         | 1 (0.27%)  | 0         |            |            |          |
| Abdominal pain                 |           |            |           |            |            |          |
| Any Grade                      | 4 (11.1%) | 34 (9.1%)  | 5 (3.1%)  |            |            |          |
| ≥3                             | 1 (2.7%)  | 5 (1.3%)   | 0         |            |            |          |
| Anemia                         |           |            |           |            |            |          |
| Any Grade                      | 4 (11.1%) | 23 (6.14%) | 2 (1.2%)  | 11(25%)    |            |          |
| ≥3                             | 1 (2.7%)  | 18 (4.8%)  | 6 (3.7%)  | 0          |            |          |
| Fever                          |           |            |           |            |            |          |
| Any Grade                      | 4 (11.1%) | 14 (3.7%)  | 4 (2.5%)  |            |            |          |
| ≥3                             | 0         | 0          | 0         |            |            |          |
| Hyperbilirubinemia             |           |            |           |            |            |          |
| Any Grade                      | 4 (11.1%) | 70 (18.7%) | 7 (4.3%)  | 7 (16%)    | 11(28.9%)  | 1 (2.5%) |
| ≥3                             | 2 (5.6%)  | 25 (6.7%)  | 4 (2.5%)  | 1 (2.3%)   | 0          | 1(2.5%)  |
| Hyperthyroidism                |           |            |           |            |            |          |
| Any Grade                      | 4 (11.1%) |            |           |            |            |          |
| ≥3                             | 1 (2.7%)  |            |           |            |            |          |
| Mood Alteration,<br>depression |           |            |           |            |            |          |
| Any Grade                      | 4 (11.1%) |            |           |            |            |          |
| ≥3                             | 0         |            |           |            |            |          |
| Hypophosphatemia               |           |            |           |            |            |          |
| Any Grade                      | 2 (5.6%)  | 22 (5.9%)  | 2 (1.2%)  |            |            |          |
| ≥3                             | 2 (5.6%)  | 18 (4.8%)  | 1 (0.6%)  |            |            |          |
| Elevated AST level             |           |            |           |            |            |          |
| Any Grade                      |           | 48 (12.8%) | 15 (9.2%) | 20 (45.5%) | 20 (52.6%) | 2 (5%)   |
| ≥3                             |           | 19 (5.1%)  | 10 (6.1%) | 6 (13.6%)  | 2 (5.26%)  | 2 (5%)   |
| Hypoalbuminemia                |           |            |           |            |            |          |
| Any Grade                      |           | 9 (2.4%)   | 0         | 14 (31.8%) |            |          |
| ≥3                             |           | 2 (0.5%)   | 0         | 2 (4.5%)   |            |          |
| Erythema Multiform             |           |            |           |            |            |          |
| Any Grade                      |           |            |           | 13 (29.5%) |            |          |
| ≥3                             |           |            |           | 2 (4.5%)   |            |          |
| Elevated serum<br>Amylase      |           |            |           |            |            |          |
| Any Grade                      |           |            |           | 7 (16%)    |            |          |
| ≥3                             |           |            |           | 1 (2.3%)   |            |          |
| Thrombocytopenia               |           |            |           |            |            |          |
| Any Grade                      |           | 19 (5.1%)  | 2 (1.2%)  | 7 (16%)    |            | 4 (10%)  |
| ≥3                             |           | 8 (2.1%)   | 0         | 2 (4.5%)   |            | 1 (2.5%) |
| Elevated ALT level             |           |            |           |            |            |          |
| Any Grade                      |           | 29 (7.8%)  | 8 (4.9%)  |            | 19 (50%)   | 1 (2.5%) |

|                                                             |  |           |          |  |           |          |
|-------------------------------------------------------------|--|-----------|----------|--|-----------|----------|
| ≥3                                                          |  | 12 (3.2%) | 8 (4.9%) |  | 2 (5.26%) | 1 (2.5%) |
| Neutropenia                                                 |  |           |          |  |           |          |
| Any Grade                                                   |  |           |          |  |           | 1 (2.5%) |
| ≥3                                                          |  |           |          |  |           | 1 (2.5%) |
| Constipation                                                |  |           |          |  |           |          |
| Any Grade                                                   |  | 24 (6.4%) | 3 (1.8%) |  |           |          |
| ≥3                                                          |  | 0         | 0        |  |           |          |
| Ascites                                                     |  |           |          |  |           |          |
| Any Grade                                                   |  | 8 (2.1%)  | 1 (0.6%) |  |           |          |
| ≥3                                                          |  | 3 (0.8%)  | 1 (0.6%) |  |           |          |
| Limb edema                                                  |  |           |          |  |           |          |
| Any Grade                                                   |  | 12 (3.2%) | 1 (0.6%) |  |           |          |
| ≥3                                                          |  | 1 (0.27%) | 0        |  |           |          |
| General disorders and administration site conditions, other |  |           |          |  |           |          |
| Any Grade                                                   |  | 8 (2.1%)  | 2 (1.2%) |  |           |          |
| ≥3                                                          |  | 5 (1.3%)  | 1 (0.6%) |  |           |          |
| Investigations, other                                       |  |           |          |  |           |          |
| Any Grade                                                   |  | 18 (4.8%) | 0        |  |           |          |
| ≥3                                                          |  | 1 (0.27%) | 0        |  |           |          |
| Back Pain                                                   |  |           |          |  |           |          |
| Any Grade                                                   |  | 2 (0.5%)  | 2 (1.2%) |  |           |          |
| ≥3                                                          |  | 1 (0.27%) | 0        |  |           |          |
| Cough                                                       |  |           |          |  |           |          |
| Any Grade                                                   |  | 4 (1.7%)  | 2 (1.2%) |  |           |          |
| ≥3                                                          |  | 0         | 0        |  |           |          |

**Supplementary Table 3. Post-regorafenib treatments reported in the included studies**

| Study              | Post-regorafenib treatment                                                                                                                                                  |
|--------------------|-----------------------------------------------------------------------------------------------------------------------------------------------------------------------------|
| Bruix 2013         | Not reported                                                                                                                                                                |
| Ogasawara 2019     | 17 patients lenvatinib; 3 patients transarterial chemoembolization (TACE); 2 patients hepatic arterial chemotherapy; 1 patient radiation therapy                            |
| Wang 2019          | 10 patients lenvatinib; 4 patients oral cytotoxic therapies; 1 patient cabozantinib; 1 patient ramucirumab; 5 patients transarterial therapies; 1 patient radiation therapy |
| Yoo 2018           | 5 patients nivolumab; 1 patient doxorubicin; 2 patients experimental therapy                                                                                                |
| RESORCE trial 2017 | Not reported                                                                                                                                                                |
| Kuzuya 2019        | Not reported                                                                                                                                                                |
| Lee 2019 (i)       | Not reported                                                                                                                                                                |
| Lee 2019 (ii)      | Not reported                                                                                                                                                                |

**Supplementary Figure 1. Funnel plots for detecting the risk of publication bias in A) overall survival analysis; B) progression-free survival analysis**

**A**

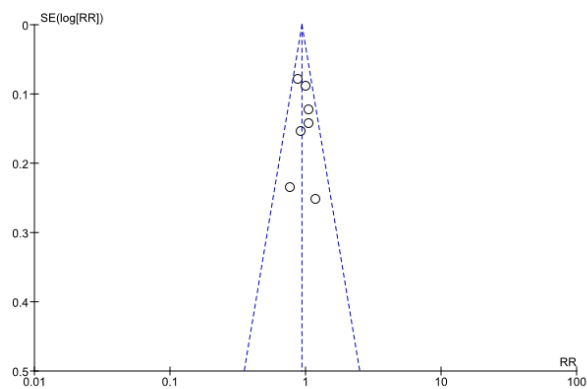

**B**

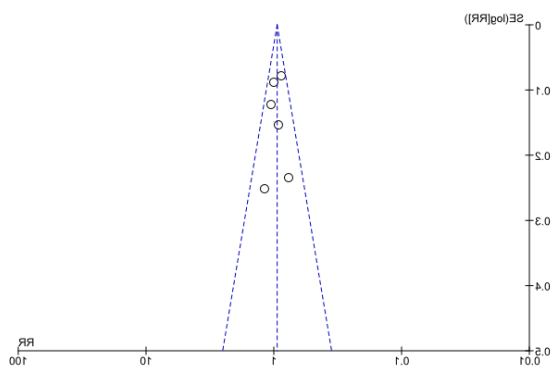

Supplementary Figure 2. Pooled analysis of treatment duration.

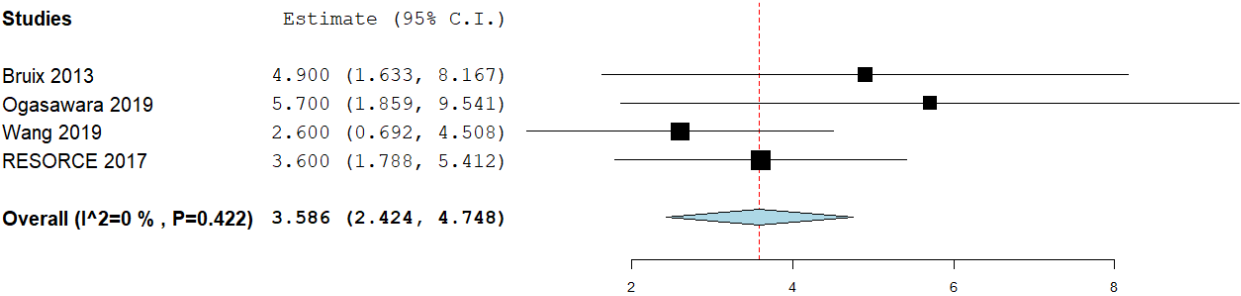

Supplement: s1 [file s1]
